# Supplementary material
Source: publisher figshare collection journal article supplement (https://sage.figshare.com/ndownloader/files/13438562)
Supplement: Supplementary file 1 [file 13438562]

Supplemental Table 2. Brain regions identified for each factor and their peak voxel coordinates. If a factor was not identified in a study, the corresponding cell is greyed out.

| Factor | Region | Peak Voxel | | |
| --- | --- | --- | --- | --- |
| *x* | *y* | *z* |
| **FLUENCY** | | | | | | |
| Mirman et al., 2015a,b |  | | | | | |
| Halai et al., 2017 | Corticospinal tract | -24 | -4 | 32 |
| Precentral gyrus | -30 | -4 | 28 |
| Precentral gyrus | -54 | 8 | 32 |
| Lacey et al., 2017 | Inferior frontal gyrus | -34 | 22 | 10 |
| Inferior frontal white matter | -34 | 12 | 14 |
| Anterior insula | -28 | 21 | -4 |
| Anterior insula | -32 | 26 | 0 |
| Parietal white matter | -21 | -32 | 38 |
| **PHONOLOGY** | | | | | | |
| Halai et al., 2017 | Planum polare | -48 | -16 | 0 |
| Posterior supramarginal gyrus | -48 | -50 | 14 |
| Posterior middle temporal gyrus | -62 | -18 | -14 |
| Lacey et al., 2017 | Postcentral gyrus/ Rolandic operculum | -56 | -8 | 10 |
| Precentral gyrus/ Rolandic operculum | -50 | -4 | 12 |
| Postcentral gyrus/ Rolandic operculum | -56 | -14 | 12 |
| Supramarginal gyrus/Parietal operculum | -60 | -26 | 16 |
| Supramarginal gyrus/Parietal operculum | -51 | -24 | 16 |
| Supramarginal gyrus/Parietal operculum | -52 | -30 | 18 |
| Heschl’s gyrus | -40 | -22 | 12 |
| Superior temporal gyrus/Planum temporale | -57 | -30 | 14 |
| Superior temporal gyrus | -51 | -39 | 22 |
| Superior temporal gyrus | -57 | -40 | 24 |
| Supramarginal gyrus | -60 | -38 | 45 |
| *Production* | | | | | | |
| Mirman et al., 2015a,b | Precentral gyrus | -50 | -16 | 36 |
| *Recognition* | | | | | | |
| Mirman et al., 2015a,b | Posterior, medial superior temporal gyrus | -37 | -24 | 11 |
| Anterior superior temporal gyrus | -51 | 0 | -7 |
| Anterior superior temporal gyrus | -49 | 10 | -12 |
| **SEMANTICS** | | | | | |
| Mirman et al., 2015a,b | External capsule underlying posterior insula | -26 | -15 | 16 |
| White matter of middle frontal gyrus at the level of the head of the caudate | -38 | 10 | 35 |
| Cortex at the juncture of the anterior inferior frontal gyrus and middle frontal gyrus | -48 | 29 | 26 |
| Halai et al., 2017 | Anterior middle temporal gyrus | -60 | -6 | -26 |
| Anterior temporal fusiform cortex | -38 | -6 | -28 |
| Posterior inferior temporal gyrus | -70 | -24 | -30 |
| Lacey et al., 2017 | Superior temporal gyrus | -46 | -8 | 0 |
| Heschl’s gyrus | -40 | -22 | 4 |
| **EXECUTIVE FUNCTIONS** | | | | | |
| Mirman et al., 2015a,b |  | | | | |
| Halai et al., 2017 |  | | | | |
| Lacey et al., 2017 | Middle frontal gyrus | -39 | 22 | 34 |
| Middle frontal gyrus | -33 | 20 | 42 |
| Frontal white matter | -28 | 14 | 33 |
| Frontal white matter | -28 | -4 | 36 |
| Frontal white matter | -32 | -14 | 40 |
| Frontal white matter | -28 | -15 | 45 |
| Frontal white matter | -22 | -26 | 44 |
| Precentral gyrus | -45 | -6 | 33 |
| Precentral gyrus | -50 | -4 | 33 |
| Precentral gyrus | -26 | -22 | 46 |
| Precentral gyrus | -39 | -14 | 46 |
| Precentral gyrus | -44 | -9 | 46 |

*Note.* The Butler et al. (2014) results were superseded by the Halai et al. (2017), so only the later results are shown in this table. The Fridriksson et al. (2016, 2018) analyses used a different methodological approach and the coordinates were not available for inclusion in this table.
